# Supplementary material
Source: PubMed Central journal article supplement (PMC2438222)
Supplement: 0710802105_Supplemental_PDF.pdf [file 0710802105_Supplemental_PDF.pdf]

# Supporting Information

Dai et al. 10.1073/pnas.0710802105

## SI Methods

**Crystallization and Data Collection.** The protein was concentrated to  $\approx 5$  mg/ml in solution containing 20 mM Tris·HCl (pH 8.0), 100 mM NaCl, and 100  $\mu$ M ligand. Crystallization was carried out by the hanging-drop vapor-diffusion method at room temperature. The reservoir solution is 100 mM Mes (pH 6.8), 0.5 M MgCl<sub>2</sub>, 15% wt/vol PEG 4000, and 10% Ethylene glycol. Crystals of ER/LY156681 belong to space group C2 2 21 with unit cell parameters  $a = 56.47$  Å,  $b = 102.761$  Å,  $c = 172.952$  Å. Crystals of ER/LY117018 belong to space group C2 2 21 with unit cell parameters  $a = 63.132$  Å,  $b = 98.737$  Å,  $c = 174.981$  Å. There is one molecule of the complex per asymmetric unit. The crystal was cooled at 100 K, by using 15–20% ethylene glycol plus the mother liquor as cryoprotectant, before data collection. X-ray diffraction data sets were collected on IMCA (Industrial Macromolecular Crystallography Association) beam lines and processed by using HKL2000. The resolution of the datasets used for structure refinement is 2.0 Å.

**HDX.** Briefly, the protein/ligand complex was diluted into a D<sub>2</sub>O-exchange buffer and subjected to HDX for 1, 30, 60, 900, and 4,200 sec. The exchange reaction was then quenched with an ice-cold, acidic solution, and the whole solution was loaded onto a house-packed pepsin column. Digested peptides were then eluted across a C<sub>18</sub> analytical column and electrosprayed directly into a Thermo Finnigan LTQ mass spectrometer.

**Protein and Reagents for HDX Analysis.** The ER ligand-binding domain (amino acids 298–554) was cloned into a modified PET vector pMCSG7 with a ligation-independent cloning site, 6 $\times$  His tag, and TEV protease site. The protein was induced in BL21 (DE3) Rosetta cells, and purified with nickel chromatography. The eluted protein mixed with a 1:30 ratio (by mg weight) of His-tagged TEV protease and dialyzed overnight in 20 mM Tris (pH 8), 100 mM NaCl, 5 mM 2-mercaptoethanol, 1 mM imidazole, and 10% glycerol. The solution was then passed through a nickel column to remove uncut ER, the cut tags, and the TEV protease. The flowthrough was diluted five times in H<sub>2</sub>O and subjected to ion-exchange chromatography with a Q-FF column (GE Healthcare). The protein was eluted in 100–200 mM NaCl, 20 mM Tris (pH 8.0), 10 mM 2-mercaptoethanol, and 10% glycerol, and then concentrated to 5.5 mg/ml. All compounds are from Eli Lilly except that raloxifene was from Sigma. In the HDX analysis, ER $\alpha$ LBD was incubated for 1 h with estradiol, a natural agonist of the receptor at two ratios: 1:5 and 1:10, respectively. The data listed in Table 2 was at 1:10 ratio. ER $\alpha$ LBD was also incubated for 1 h with ligands at 1:5 ratio for DES, ICI 182780, 4-hydroxytamoxifen, raloxifene, and lasofoxifene and 1:10 ratio for bazedoxifene and compounds LY88074, LY156681, LY165176, and LY117018. The protein concentration was 12  $\mu$ M in the deuterium incubation buffer.

**Structure Determination and Refinement.** The crystal structure was determined by the method of molecular replacement with

AMORE by using internal ER $\alpha$ LBD structures as a search model. The program suite QUANTA 2000 (Accelrys, Inc.) factors are  $R_{\text{work}} = 0.208$ ,  $R_{\text{free}} = 0.257$  for crystal ER/LY156681, and  $R_{\text{work}} = 0.210$ ,  $R_{\text{free}} = 0.273$  for crystal ER/LY117018 (Table S1). The coordinates have been deposited in the Protein Data Bank (PDB ID codes = 2R6W and 2R6Y).

**ER Binding Assay.** The competition binding assay was performed in a buffer containing 50 mM Hepes (pH 7.5), 1.5 mM EDTA, 150 mM NaCl, 10% glycerol, 1 mg/ml ovalbumin, and 5 mM DTT, using 0.025  $\mu$ Ci per well [<sup>3</sup>H]estradiol (NET517 at 118 Ci/mmol, 1.5 nM E<sub>2</sub>; NEN/PerkinElmer), and 10 ng per well ER $\alpha$  or ER $\beta$ . Nonspecific binding was determined in the presence of 1  $\mu$ M 17- $\beta$  estradiol (E<sub>2</sub>). The binding reaction was incubated 4 h at room temperature, and then a cold DCC buffer was added to each reaction [The DCC buffer contains per 50 ml of assay buffer, 0.75 g of charcoal (Sigma), and 0.25 g of dextran (Amersham Pharmacia)]. Plates were mixed for 8 min on an orbital shaker at 4°C and then centrifuged at 1,000  $\times$  g at 4°C for 10 min. An aliquot of the mix was added to Wallac Optiphase “Hisafe 3” scintillation fluid, incubated for 5 h, and read in a Wallac Microbeta counter. The  $K_d$  for [<sup>3</sup>H]estradiol was determined by saturation binding for ER $\alpha$  or ER $\beta$  receptors. The IC<sub>50</sub> values for compounds were converted to  $K_i$  using Cheng–Prusoff equation.

**MCF-7 Cell Assay.** MCF-7 breast adenocarcinoma cells (ATCC HTB 22) were grown in assay medium MEM (phenol red-free, GIBCO–BRL) supplemented with 10% DCC-FBS. Cells were assayed by plating 8,000 cells in each well of 96-well Cytostar T scintillation plates (Amersham) and incubated at 37°C for 24 h before adding compounds. For antagonist mode, 10 pM E<sub>2</sub> was added along with dilutions of compounds for 48 h, and then medium containing 0.01  $\mu$ Ci of [<sup>14</sup>C]thymidine (52 mCi/ul; Amersham) was added to each well. The plates were incubated overnight and then quantitated on a Wallac counter. The data were averaged to calculate an IC<sub>50</sub> and percentage of inhibition at 1  $\mu$ M.

**Ishikawa Assay.** Estrogen stimulation and antagonism were measured in Ishikawa human endometrial tumor cells by alkaline phosphate quantitation. The cells were incubated in DMEM/F-12 (3:1) supplemented with 5% DCC-stripped FBS (HyClone), L-glutamine (2 nM), MEM sodium pyruvate (1 mM), Hepes (2 mM) (all from Life Technologies). For the agonist mode, plates received diluted compounds only, whereas antagonist mode plates additionally received 1 nM estradiol (E<sub>2</sub>; Sigma). Cells were incubated for 48 h, and then fresh compounds were added for an additional 72 h. The assay was quenched by removing medium and rinsing plates twice in PBS, and the plates were dried for 5 min and frozen at –70°C. After thawing, 100  $\mu$ l of 1-Step *p*-nitrophenyl phosphate (PNPP) (Pierce) were added for 20 min, and plates were read on a spectrophotometer at 405 nm. For the agonist mode, a percentage increase over control was calculated. The data were fitted to a linear interpolation to derive IC<sub>50</sub> values for the antagonist mode, and a percentage efficacy was calculated that blocks the E<sub>2</sub> (1 nM) stimulus.

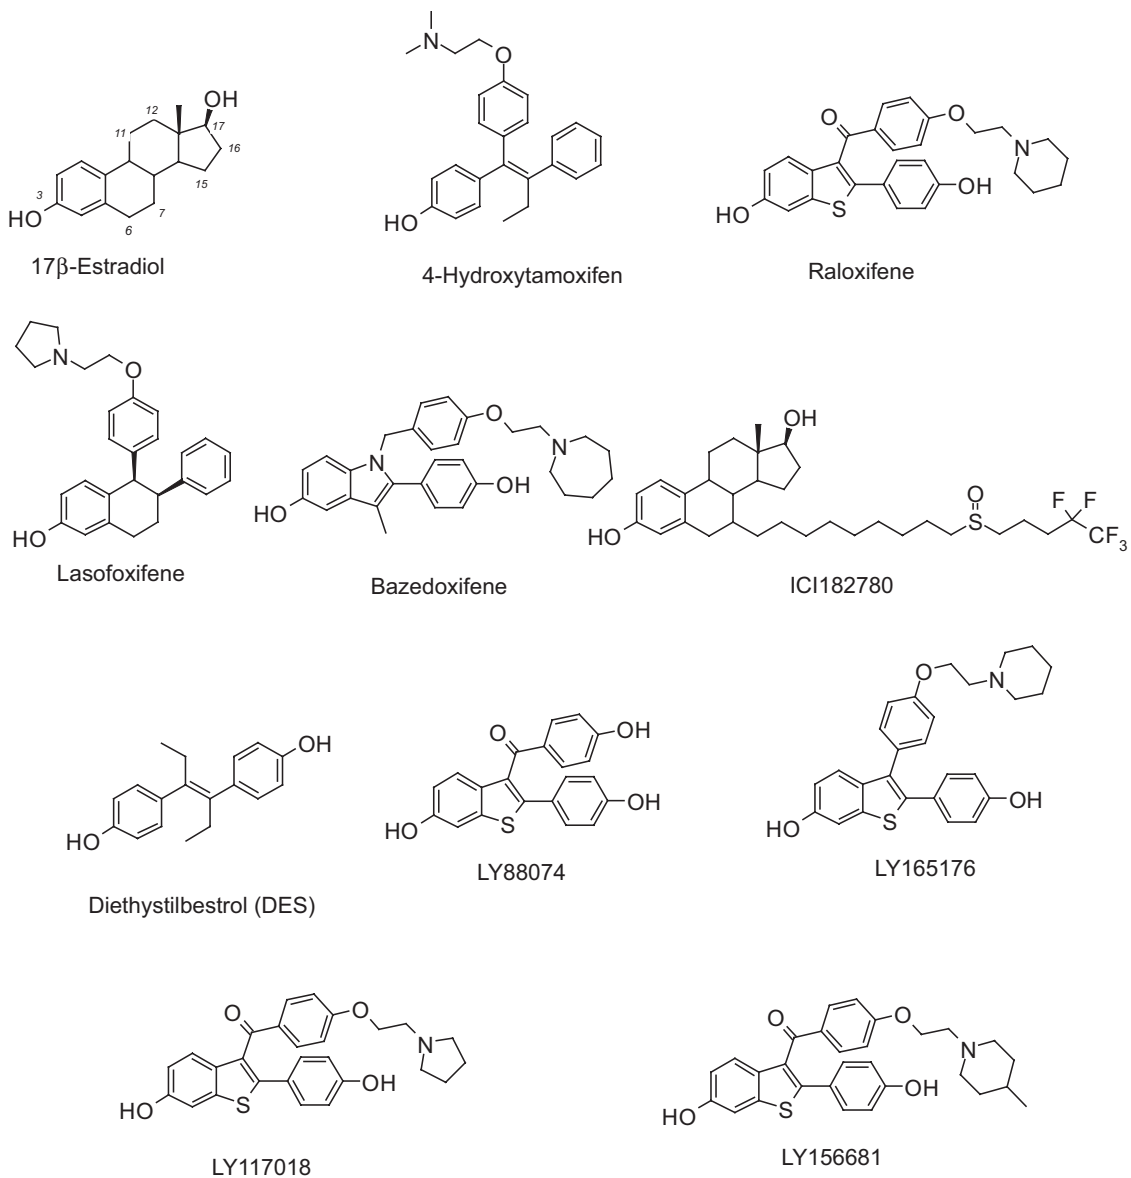

Fig. S1. Chemical structures of 11 ER ligands.





## Ishikawa Antagonist assay

## Ishikawa Agonist assay

Antagonist mode in Ishikawa assay - 4-hydroxytamoxifen like

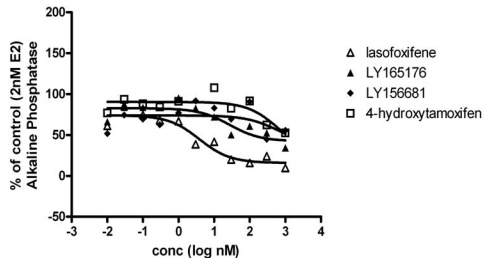

Agonist mode in Ishikawa assay - 4-hydroxytamoxifen like

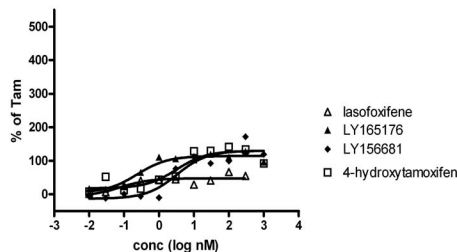

Antagonist mode in Ishikawa assay - Raloxifene like

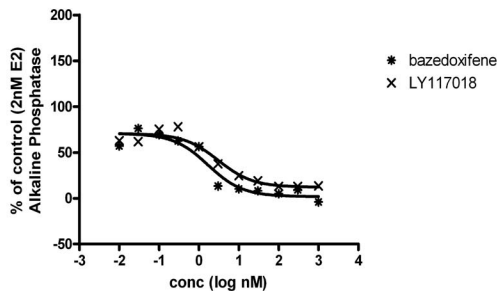

Agonist mode in Ishikawa assay - Raloxifene like

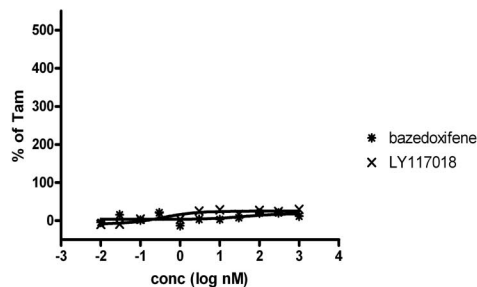

Antagonist mode in Ishikawa assay - Estradiol like

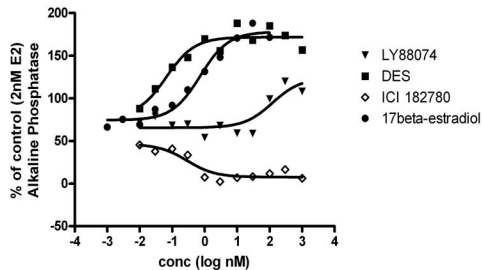

Agonist mode in Ishikawa assay - Estradiol like

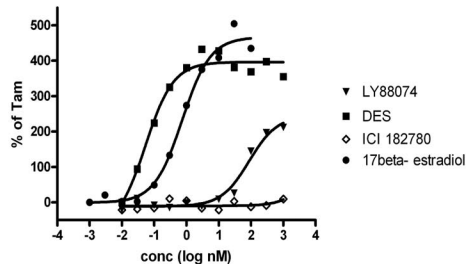

**Fig. S4.** Antagonist and agonist modes of ER ligands in Ishikawa cell assay. The curves are shown as 4-hydroxytamoxifen-like group, raloxifene-like group, and estradiol-like group individually which is correlated to the HDX classification in the study. In the antagonist mode assay, the percentage of inhibition is referred to blocking 2 nM of estradiol and in the agonist mode assay; the percentage of stimulation was compared with 4-hydroxytamoxifen.

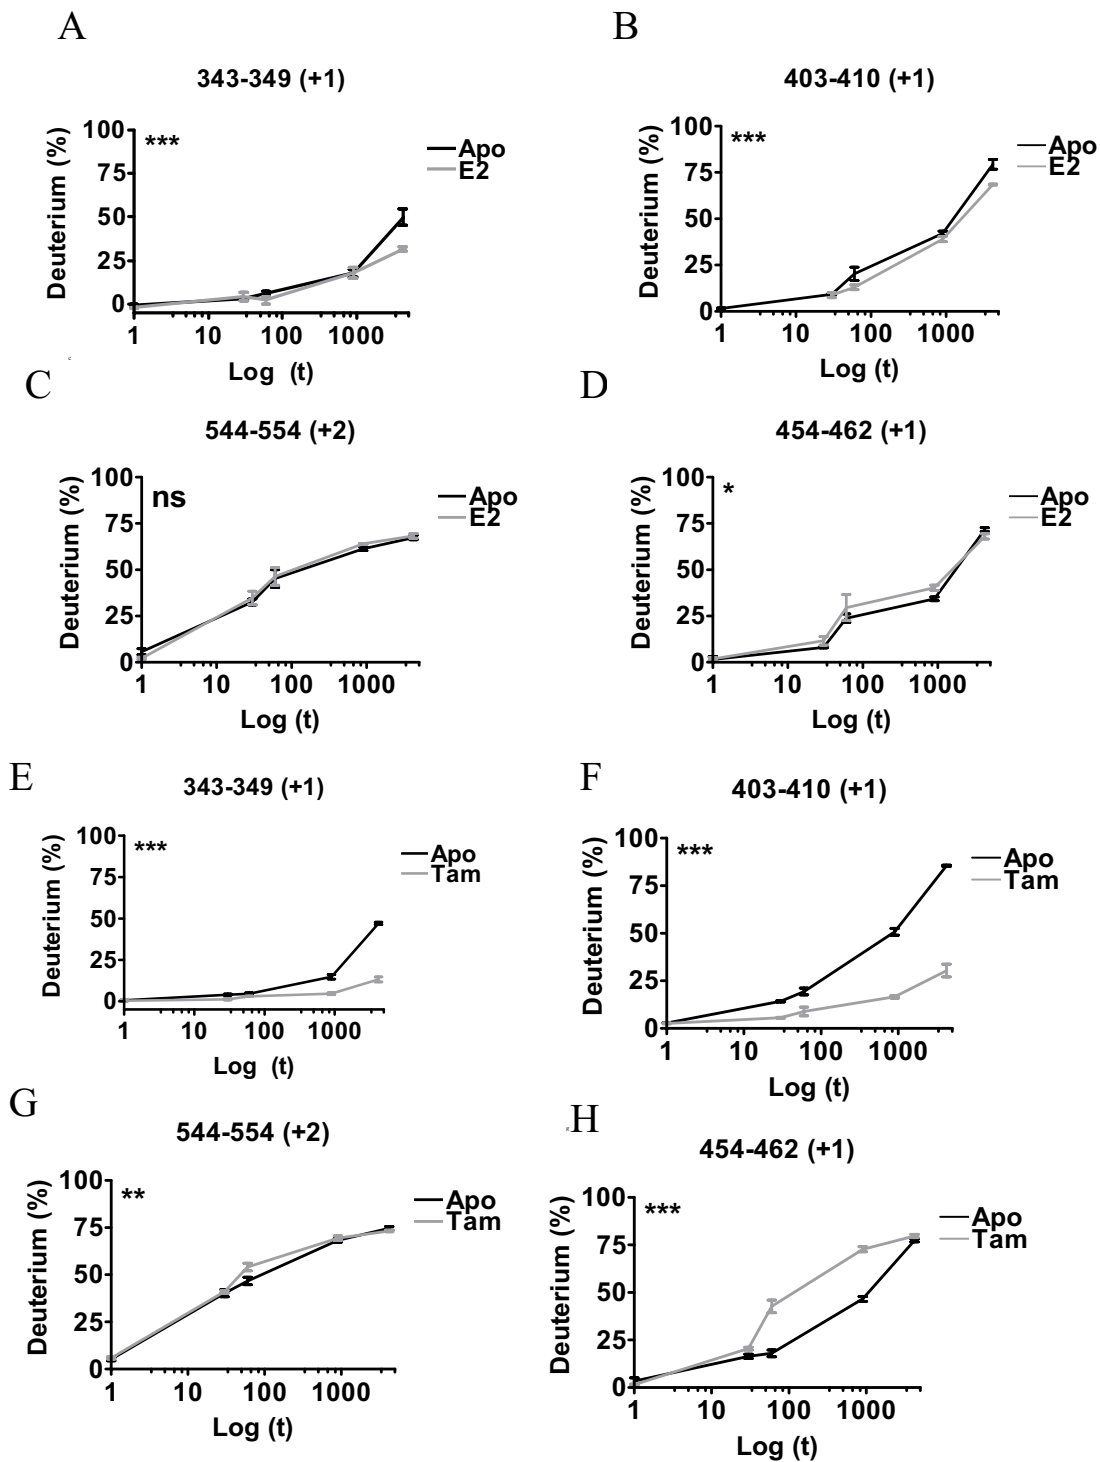

**Fig. S5.** Deuterium incorporation curves of four peptides. HDX data for the apo ER LBD is represented by the black line. The gray line represents the HDX data for the ligand bound ER LBD. Helix 3 (343–349) and  $\beta$ -sheet1/ $\beta$ -sheet2 (403–410) are protected from HDX when incubated with 4-hydroxytamoxifen (E and F) compared with estradiol (A and B) versus helix 12 (544–554) has no significant change (C and G). Helix 10 and the loop region (454–462) shows an increase in deuterium incorporation when incubated with 4-hydroxytamoxifen (H) compared with estradiol (D). Statistical summary from a two-way ANOVA between apo and ligand bound data. \*\*\*,  $P < 0.001$ ; \*\*,  $P = 0.001$  to  $0.01$ ; \*,  $P = 0.01$  to  $0.5$ ; ns = not significant. The value in parentheses represents the charge state of the peptide ion.

**Table S1. Data collection and refinement statistics (molecular replacement)**

|                                                      | Crystal 1 name          | Crystal 2 name          |
|------------------------------------------------------|-------------------------|-------------------------|
| Data collection                                      | 156,681                 | 117,018                 |
| Space group                                          | C2 2 21                 | C2 2 21                 |
| Cell dimensions                                      |                         |                         |
| <i>a</i> , <i>b</i> , <i>c</i> , Å                   | 56.47, 102.761, 172.952 | 63.132, 98.737, 174.981 |
| <i>a</i> , <i>b</i> , <i>c</i> , °                   | 90.00, 90.00, 90.00     | 90.00, 90.00, 90.00     |
| Resolution, Å                                        |                         |                         |
| <i>R</i> <sub>sym</sub> or <i>R</i> <sub>merge</sub> | 0.048 (0.219)           | 0.045 (0.324)           |
| <i>I</i> / <i>σ</i>                                  | 35.7 (4.2)              | 31 (2.0)                |
| Completeness,<br>%                                   | 92.2 (57.1)             | 91.3 (54.8)             |
| Redundancy                                           | 6.3 (3.4)               | 4.5 (3.3)               |
| Refinement                                           |                         |                         |
| Resolution, Å                                        | 2.00                    | 2.00                    |
| No. of<br>reflections                                | 29,199                  | 33,075                  |
| <i>R</i> <sub>work</sub> / <i>R</i> <sub>free</sub>  | 0.208/0.257             | 0.210/0.273             |
| No. of atoms                                         |                         |                         |
| Protein                                              | 3,626                   | 3,651                   |
| Ligand/ion                                           | 70                      | 66                      |
| Water                                                | 104                     | 150                     |
| Mean <i>B</i> -factors                               | 40.144                  | 42.581                  |
| R.m.s.<br>deviations                                 |                         |                         |
| Bond lengths,<br>Å                                   | 0.017                   | 0.017                   |
| Bond angles,<br>°                                    | 1.579                   | 1.569                   |

**Table S2. Weights for each peptide in each group.**

| Variable | Group 1      | Group 2      | Group 3      |
|----------|--------------|--------------|--------------|
| Constant | -220,764,435 | -1.79E + 09  | -976,264,088 |
| Loop     | -46,395,965  | -132,140,350 | -97,570,816  |
| S1S2     | -29,950,674  | -85,297,475  | -62,978,767  |
| H8       | -8,424,706   | -23,988,630  | -17,708,508  |
| H10.1    | 3,405,652    | 9,723,162    | 7,197,383    |
| H10.2    | 2,245,260    | 6,364,138    | 4,675,888    |

A total of five peptides: the loop (320–327) S1S2 (403–410), H8 (421–428) and the two charge states of H10 (463–486) as listed in Table 2 were selected for the classification.
